# Supplementary material for: Deterministic splicing of Dscam2 is regulated by Muscleblind
Source: PubMed Central journal article supplement — Sci Adv. 2019 Jan 16;5(1):eaav1678. doi: 10.1126/sciadv.aav1678 (PMC6357765; doi:10.1126/sciadv.aav1678), 2019-01-16
Supplement: aav1678_SM.pdf [file aav1678_SM.pdf]

## Supplementary Materials for

### Deterministic splicing of *Dscam2* is regulated by Muscleblind

Joshua Shing Shun Li and S. Sean Millard\*

\*Corresponding author. Email: s.millard@uq.edu.au

Published 16 January 2019, *Sci. Adv.* **5**, eaav1678 (2019)

DOI: 10.1126/sciadv.aav1678

#### This PDF file includes:

##### Supplementary Materials

Fig. S1. *Mbl* LOF results in aberrant *Dscam2.10A* reporter expression in eye mosaic clones.

Fig. S2. *Mbl* LOF is associated with increased *Dscam2.10A* inclusion without affecting other *Dscam2* splicing events.

Fig. S3. *Mbl* is expressed in R cells, neurons, and glia.

Fig. S4. *Mbl* expression is cell type specific and correlates with *Dscam2.10B*.

Fig. S5. Neurons overexpressing *mbl* phenocopy *Dscam2* single-isoform mutants.

Table S1. List of tested RNAi lines that did not derepress *Dscam2.10A* in R cells.

## Supplementary Materials

### Fly genotypes

#### R cell RNAi experiments (Fig. 1)

1. w; *GMR-GFP, GMR-Gal4/CyO; Dscam2.10B-LexA, LexAop-myr-tdTomato/TM6B*
2. w; *GMR-GFP, GMR-Gal4/CyO; Dscam2.10A-LexA, LexAop-myr-tdTomato/TM6B*
3. w, *UAS-Dcr-2; GMR-GFP, GMR-Gal4/CyO; Dscam2.10A-LexA, LexAop-myr-tdTomato/TM6B*
4. w, *UAS-Dcr-2; GMR-GFP, GMR-Gal4/UAS-mbl-RNAi(v28732); Dscam2.10A-LexA, LexAop-myr-tdTomato/+*
5. w, *UAS-Dcr-2; GMR-GFP, GMR-Gal4/+; Dscam2.10A-LexA, LexAop-myr-tdTomato/UAS-mbl-RNAi(TRiP.JF03264)*

#### mbl whole animal experiments (Fig. 1)

1. w; +; *Dscam2.10B-LexA, LexAop-myr-tdTomato/TM6B*
2. w; +; *Dscam2.10A-LexA, LexAop-myr-tdTomato/TM6B*
3. w; *mbl<sup>e127</sup>/CyO,GFP; Dscam2.10A-LexA, LexAop-myr-tdTomato/TM6B*
4. w; *mbl<sup>M100976</sup>/CyO,GFP; Dscam2.10A-LexA, LexAop-myr-tdTomato/TM6B*
5. w; *mbl<sup>M104093</sup>/CyO,GFP; Dscam2.10A-LexA, LexAop-myr-tdTomato/TM6B*
6. w; *mbl<sup>e127</sup>/mbl<sup>M100976</sup>; Dscam2.10A-LexA, LexAop-myr-tdTomato/+*
7. w; *mbl<sup>M104093</sup>/mbl<sup>M100976</sup>; Dscam2.10A-LexA, LexAop-myr-tdTomato/+*

#### mbl ey-FLP MARCM experiments (Fig. 2)

1. w, *ey-FLP; FRT42D, Tub-Gal80/FRT42D; Dscam2.10A-LexA, LexAop-myr-tdTomato, Act5c-Gal4, UAS-mCD8-GFP/+*
2. w, *ey-FLP; FRT42D, Tub-Gal80/FRT42D, mbl<sup>e27</sup>; Dscam2.10A-LexA, LexAop-myr-tdTomato, Act5c-Gal4, UAS-mCD8-GFP/+*
3. w, *ey-FLP; FRT42D, Tub-Gal80/FRT42D, mbl<sup>e127</sup>; Dscam2.10A-LexA, LexAop-myr-tdTomato, Act5c-Gal4, UAS-mCD8-GFP/+*

#### mbl expression experiments (Fig. 3)

1. w; *UAS-mCD8-GFP/+; mbl<sup>NP0420</sup>-Gal4/+*
2. w; *UAS-mCD8-GFP/+; mbl<sup>M100139</sup>-Gal4/+*

3. w; *Dac-FLP/+*; *elav-Gal4/ UAS>stop>myr::smGdP-V5-THS-UAS>stop>myr::smGdP-cMyc*
4. w; *Dac-FLP/+*; *mb1<sup>NP0420</sup>-Gal4/ UAS>stop>myr::smGdP-V5-THS-UAS>stop>myr::smGdP-cMyc*
5. w; *Dac-FLP/+*; *mb1<sup>M100139</sup>-Gal4/ UAS>stop>myr::smGdP-V5-THS-UAS>stop>myr::smGdP-cMyc*
6. w; *Dac-FLP/+*; *Dscam2.10A-Gal4/ UAS>stop>myr::smGdP-V5-THS-UAS>stop>myr::smGdP-cMyc*
7. w; *Dac-FLP/+*; *Dscam2.10B-Gal4/ UAS>stop>myr::smGdP-V5-THS-UAS>stop>myr::smGdP-cMyc*
8. w; +; *mb1<sup>NP0420</sup>-Gal4/UAS-GFP.nls*
9. w; +; *mb1<sup>M100139</sup>-Gal4/UAS-GFP.nls*

*mb1* ectopic expression in MBs (Fig. 4)

1. w; +; *Dscam2.10A-LexA, LexAop-myr-tdTomato, Act5c-Gal4, UAS-mCD8-GFP/+*
2. w; +; *Dscam2.10B-LexA, LexAop-myr-tdTomato, Act5c-Gal4, UAS-mCD8-GFP/+*
3. w; *P{EP}mb1<sup>B2-E1</sup>/+*; *Dscam2.10B-LexA, LexAop-myr-tdTomato, Act5c-Gal4, UAS-mCD8-GFP/+*
4. w; +; *Dscam2.10B-LexA, LexAop-myr-tdTomato, Act5c-Gal4, UAS-mCD8-GFP/UAS-mblA*
5. w; +; *Dscam2.10B-LexA, LexAop-myr-tdTomato, Act5c-Gal4, UAS-mCD8-GFP/UAS-mblB*
6. w; +; *Dscam2.10B-LexA, LexAop-myr-tdTomato, Act5c-Gal4, UAS-mCD8-GFP/UAS-mblC*
7. w; +; *Dscam2.10B-LexA, LexAop-myr-tdTomato, Act5c-Gal4, UAS-mCD8-GFP/UAS-MBNL1<sub>35</sub>*
8. w; +; *Dscam2.10B-LexA, LexAop-myr-tdTomato, UAS-mCD8-GFP/UAS-mblA; OK107-Gal4/+*
9. w; +; *Dscam2.10B-LexA, LexAop-myr-tdTomato, UAS-mCD8-GFP/UAS-mblB; OK107-Gal4/+*
10. w; +; *Dscam2.10B-LexA, LexAop-myr-tdTomato, UAS-mCD8-GFP/UAS-mblC; OK107-Gal4/+*
11. w; +; *Dscam2.10B-LexA, LexAop-myr-tdTomato, UAS-mCD8-GFP/UAS-MBNL1<sub>35</sub>; OK107-Gal4/+*

### Lamin neuron FlpOut *mb1* LOF (Fig. 5)

1. w, 27G05-FLP/(+ or Y); Bl/CyO; *Dscam2.10B-Gal4/ UAS>stop>myr::smGdP-V5-THS-UAS>stop>myr::smGdP-cMyc*
2. w, 27G05-FLP/(+ or Y); Bl/CyO; *Dscam2.10A-Gal4/ UAS>stop>myr::smGdP-V5-THS-UAS>stop>myr::smGdP-cMyc*
3. w, 27G05-FLP/(+ or Y); *mb1<sup>e127</sup>/ CyO; Dscam2.10A-Gal4/ UAS>stop>myr::smGdP-V5-THS-UAS>stop>myr::smGdP-cMyc*
4. w, 27G05-FLP/(+ or Y); *mb1<sup>M100976</sup>/CyO; Dscam2.10A-Gal4/ UAS>stop>myr::smGdP-V5-THS-UAS>stop>myr::smGdP-cMyc*
5. w, 27G05-FLP/(+ or Y); *mb1<sup>e127</sup>/ mb1<sup>M100976</sup>; Dscam2.10A-Gal4/ UAS>stop>myr::smGdP-V5-THS-UAS>stop>myr::smGdP-cMyc.*
6. w, 27G05-FLP/(+ or Y); *elav-Gal4/LexAop2>stop>myr::smGdP-V5; Dscam2.10A-LexA/TM2.*
7. w, 27G05-FLP/(+ or Y); *elav-Gal4/LexAop2>stop>myr::smGdP-V5; Dscam2.10B-LexA/TM2.*
8. w, 27G05-FLP/(+ or Y); *elav-Gal4/LexAop2>stop>myr::smGdP-V5; Dscam2.10B-LexA/UAS-*mb1B*.*

### L1 axonal and dendritic defects (Fig. 5)

1. w, 27G05-FLP/(+ or Y); Bl.CyO; *Dscam2.10A-Gal4/ UAS>stop>myr::smGdP-V5-THS-UAS>stop>myr::smGdP-cMyc.*
2. w, 27G05-FLP/(+ or Y); *mb1<sup>e127</sup>/ mb1<sup>M100976</sup>; Dscam2.10A-Gal4/ UAS>stop>myr::smGdP-V5-THS-UAS>stop>myr::smGdP-cMyc.*

### *mb1* ey-FLP mosaic experiments (Fig. S1)

1. w, *ey-FLP; FRT42D, GMR-myr-GFP/FRT42D; Dscam2.10B-LexA, LexAop-myr-tdTomato, UAS-mCD8-GFP/+*
2. w, *ey-FLP; FRT42D, GMR-myr-GFP/FRT42D; Dscam2.10A-LexA, LexAop-myr-tdTomato, UAS-mCD8-GFP/+*
3. w, *ey-FLP; FRT42D, GMR-myr-GFP/FRT42D, Df(2R)154 ; Dscam2.10A-LexA, LexAop-myr-tdTomato, UAS-mCD8-GFP/+*
4. w, *ey-FLP; FRT42D, GMR-myr-GFP/FRT42D, mb1<sup>e27</sup>; Dscam2.10A-LexA, LexAop-myr-tdTomato, UAS-mCD8-GFP/+*

5. *w, ey-FLP; FRT42D, GMR-myr-GFP/FRT42D, mbl<sup>M100976</sup>; Dscam2.10A-LexA, LexAop-myr-tdTomato, UAS-mCD8-GFP/+*

*mbl* expression (Fig. S3)

1. *w; mbl<sup>K01212</sup>-LacZ*
2. *w; mbl<sup>NP1161</sup>-Gal4/CyO, UAS-LacZ*
3. *w; mbl<sup>M100139</sup>-Gal4/+; UAS-CD8-GFP/+*
4. *w; mbl<sup>M100139</sup>-Gal4/UAS-GFP.nls*
5. *w; mbl<sup>NP0420</sup>-Gal4/UAS-GFP.nls*

MB axon defects (Fig. S5)

1. *w; +; +*
2. *w; +; Dscam2<sup>null</sup>/ Dscam2<sup>null</sup>*
3. *w; +; Dscam2A/ Dscam2A*
4. *w; +; Dscam2B/ Dscam2B*
5. *w; mbl<sup>e127</sup>/ mbl<sup>M100976</sup>*
6. *w; +; +; OK107-Gal4/+*
7. *w; UAS-mbl-RNAi(v28732)/+*
8. *w; UAS-mbl-RNAi(v28732)/+; +; OK107-Gal4/+*
9. *w; P{EP}mbl<sup>B2-E1</sup>/+*
10. *w; P{EP}mbl<sup>B2-E1</sup>/+; +; OK107-Gal4/+*
11. *w; +; UAS-mblA/+*
12. *w; +; UAS-mblA/+; OK107-Gal4/+*
13. *w; +; UAS-mblB/+*
14. *w; +; UAS-mblB/+; OK107-Gal4/+*
15. *w; +; UAS-mblC/+*
16. *w; +; UAS-mblC/+; OK107-Gal4/+*
17. *w; +; UAS-MBNL1<sub>35</sub>/+*
18. *w; +; UAS-MBNL1<sub>35</sub>/+; OK107-Gal4/+*

3rd instar  
Eye mosaics (ey-FLP)

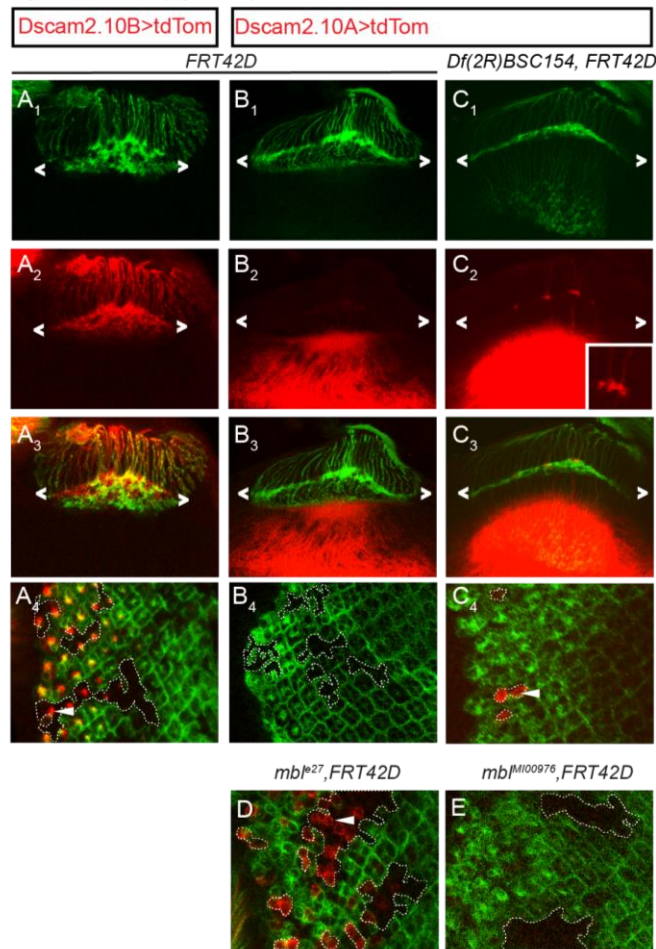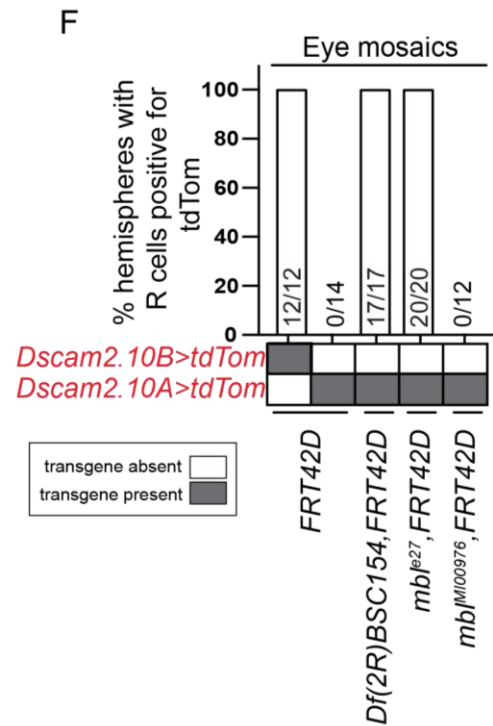

**Fig. S1. *Mbl* LOF results in aberrant *Dscam2.10A* reporter expression in eye mosaic clones.** (A-F) Eye mosaics of *mbl* LOF alleles cause de-repression of *Dscam2.10A>tdTom* in R cells. *WT* mosaic clones (GFP-negative) express *Dscam2.10B>tdTom* (A<sub>1</sub>-A<sub>4</sub>) but not *Dscam2.10A>tdTom* (B<sub>1</sub>-B<sub>4</sub>). *Mbl* mutant (GFP-negative) clones, *Df(2R)BSC154* show aberrant *Dscam2.10A* expression in R cells (C<sub>1</sub>-C<sub>4</sub>). (D) *mbl<sup>e27</sup>* eye clones exhibit de-repression of *Dscam2.10A* (red). (E) Clones of a *mbl* allele that deleted only a portion of all *mbl* isoforms (*mbl<sup>M100976</sup>*) do not exhibit de-repression of *Dscam2.10A*. (F) Quantification of *Dscam2.10>tdTom* expression in third instar R cells with *mbl* LOF eye mosaic clones. Y-axis represents the number of optic lobes with R cells positive for tdTom over total number of optic lobes quantified as a percentage. On the x-axis, the presence of a transgene is indicated with a grey box.

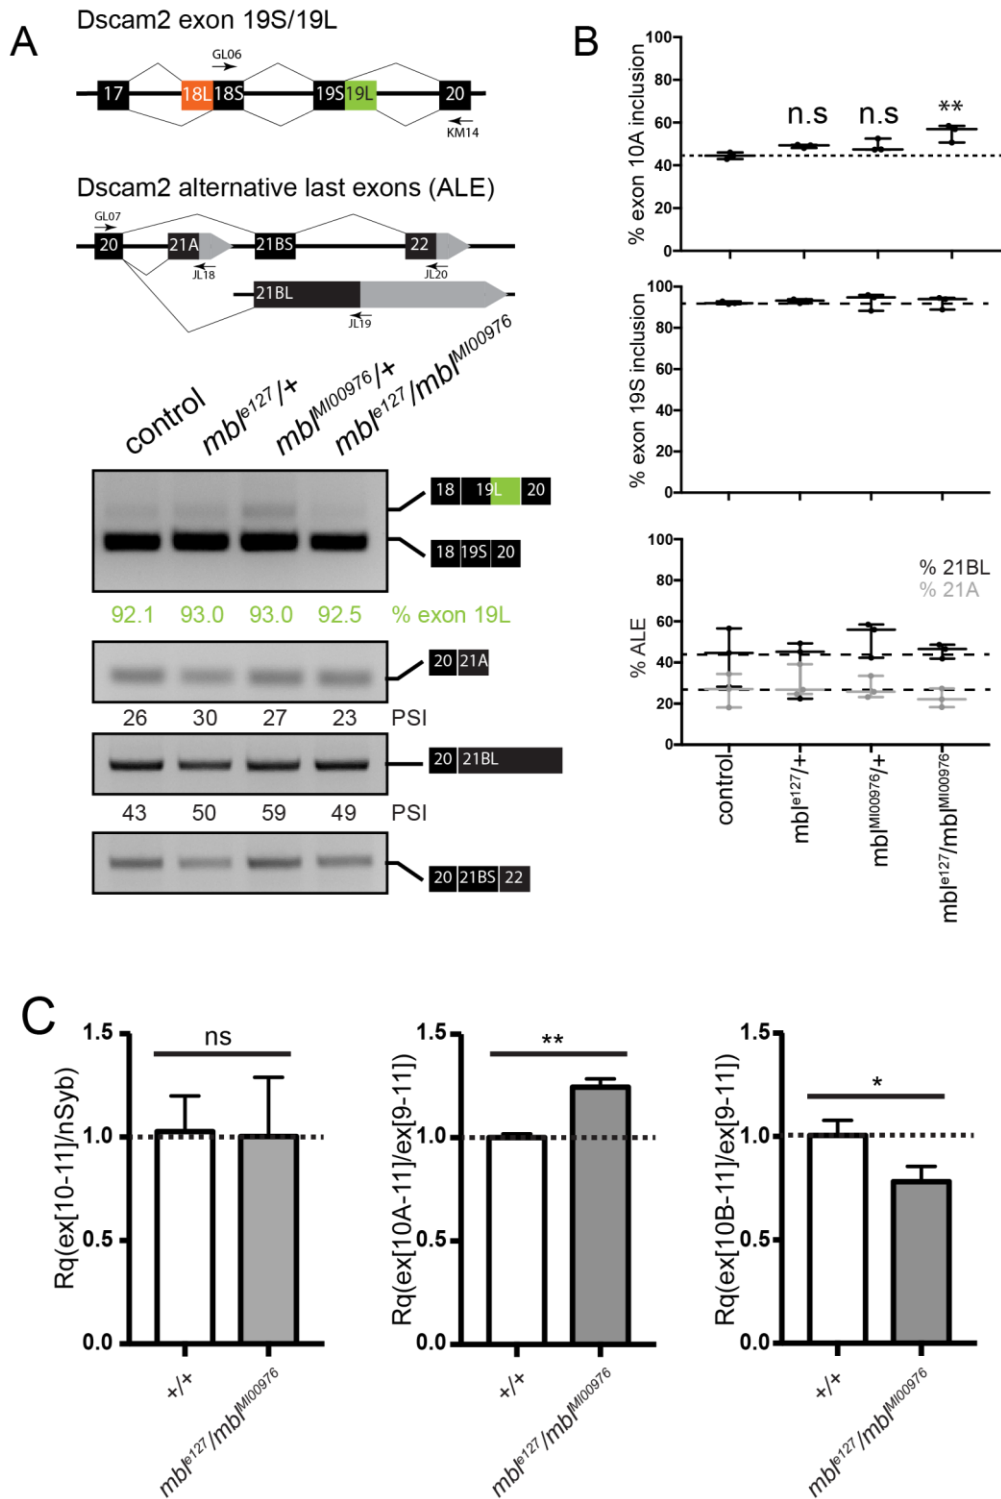

**Fig. S2. *Mbl* LOF is associated with increased *Dscam2.10A* inclusion without affecting other *Dscam2* splicing events.** (A) *Mbl* LOF ( $mb1^{e127}/mb1^{M100976}$ ) does not affect other *Dscam2* splicing events. Semiquantitative RT-PCR from different genotypes indicated. Primers amplified the variable region that includes exon 19S/19L or three alternative last exons (ALE). Percentage of 19L inclusion was calculated by dividing the 19L band by

19L+19S. Percentage of ALE 21A and ALE 21BL inclusion was calculated by dividing respectively the 21A and 21BL band by 21A+21BL+21BS (total). **(B)** Graphs of RT-PCR data from A and Fig. 1P. Top graph depicts *Dscam2.10A* inclusion. Middle graph represents exon 19S inclusion. Bottom graph represents percentage inclusion of different ALEs. Plots show minimum (bottom line), mean (middle line) and maximum (top line) points, where individual points depict biological replicates. Dashed line represents mean of control. **(C)** Quantitative RT-PCR of *mbl* LOF mutant (*mbl*<sup>e127</sup>/*mbl*<sup>M100976</sup>) show increased exon 10A inclusion and decreased exon 10B inclusion. The left graph shows *Dscam2.10* levels compared to *synaptobrevin* (*nSyb*). The middle graph shows *Dscam2.10A* levels compared to *Dscam2.10*. The right graph shows *Dscam2.10B* levels compared to *Dscam2*. Bar graph format (error bars depict standard error of means). The y-axis is the relative quantity (Rq). Dashed line represents mean of control. Unpaired t-test was conducted to compare Rq levels between control and *mbl* LOF mutants. ns  $P > 0.05$ , \*  $P < 0.05$ , \*\*  $P < 0.01$ .



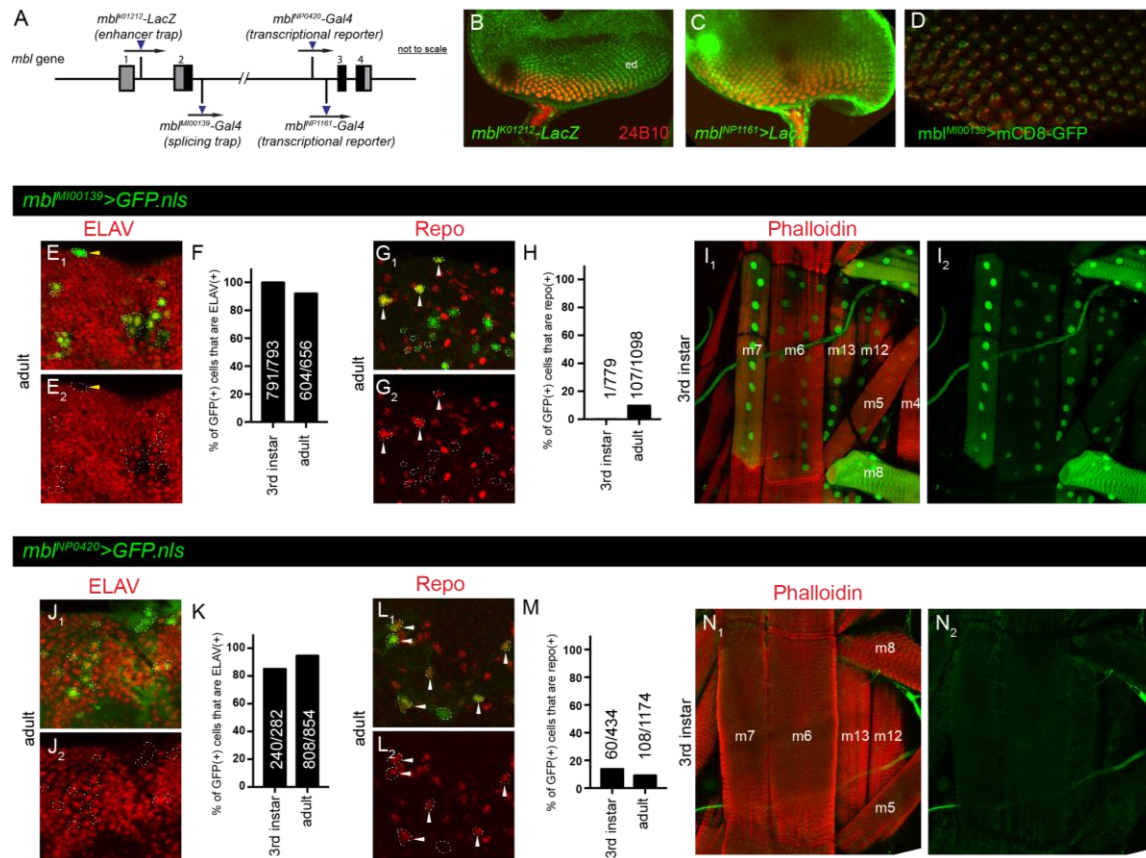

**Fig. S3. *Mbl* is expressed in R cells, neurons, and glia.** (A) Schematic showing the insertion locations of different *mbl* reporters. Translated regions (black) and non-translated regions (grey) are shown. (B-D) *Mbl* is expressed in R cells (red) in third instar eye-discs (ed). The *mbl* enhancer traps *mbl*<sup>K01212</sup>-LacZ (B), *mbl*<sup>NP1161</sup>-Gal4 (C) and splicing trap reporter *mbl*<sup>MI00139</sup>-Gal4 (D, green) overlapped with a marker of R cells (24B10). (E-I) *mbl*<sup>MI00139</sup>>*GFP.nls* is expressed in neurons and muscles. (E<sub>1</sub>-E<sub>2</sub>) Representative confocal image of a *mbl*<sup>MI00139</sup>>*GFP.nls* (green) adult brain co-labeled with an ELAV antibody (red). Dashed lines demarcate GFP(+) cells. Yellow solid arrowheads show GFP(+) cells that are ELAV(-). (F) Quantification of *mbl* in third instar and adult brains where ~90-100% of GFP(+) cells are also ELAV(+). Y-axis represents the number of GFP(+) cells positive for ELAV quantified as a percentage. (G<sub>1</sub>-G<sub>2</sub>) Representative confocal image of a *mbl*<sup>MI00139</sup>>*GFP.nls* adult brain labeled with a Repo antibody (red). Dashed lines demarcate GFP(+) cells. White solid arrowheads show GFP(+) cells that are positive for Repo. (H) Quantification of *mbl*<sup>MI00139</sup>>*GFP.nls* where ~0-10% of *mbl*<sup>MI00139</sup>>*GFP.nls* (+) cells are also Repo(+). Y-axis represents the number of GFP(+) cells positive for Repo. (I) Representative confocal image of a *mbl*<sup>MI00139</sup>>*GFP.nls* adult muscle co-labeled with Phalloidin (red) and GFP (green). (J-L) *mbl*<sup>NP0420</sup>>*GFP.nls* is expressed in neurons and muscles. (J<sub>1</sub>-J<sub>2</sub>) Representative confocal images of a *mbl*<sup>NP0420</sup>>*GFP.nls* (green) adult brain co-labeled with an ELAV antibody (red). Dashed lines demarcate GFP(+) cells. Yellow solid arrowheads show GFP(+) cells that are ELAV(-). (K) Quantification of *mbl* in third instar and adult brains where ~90-100% of GFP(+) cells are also ELAV(+). Y-axis represents the number of GFP(+) cells positive for ELAV quantified as a percentage. (L<sub>1</sub>-L<sub>2</sub>) Representative confocal image of a *mbl*<sup>NP0420</sup>>*GFP.nls* adult brain labeled with a Repo antibody (red). Dashed lines demarcate GFP(+) cells. White solid arrowheads show GFP(+) cells that are positive for Repo. (M) Quantification of *mbl*<sup>NP0420</sup>>*GFP.nls* where ~0-10% of *mbl*<sup>NP0420</sup>>*GFP.nls* (+) cells are also Repo(+). Y-axis represents the number of GFP(+) cells positive for Repo. (N) Confocal images of muscles showing *mbl*<sup>MI00139</sup>>*GFP.nls* expression. (N<sub>1</sub>) Phalloidin (red) and GFP (green). (N<sub>2</sub>) GFP (green). Muscle segments are labeled m4, m5, m6, m7, m8, m12, m13.

quantified as a percentage. (I<sub>1</sub>-I<sub>2</sub>) *mb1<sup>MI00139</sup>>GFP.nls* expression is also found in third instar muscles m4-m8, m12 and m13 (Phalloidin, red).

(J<sub>1</sub>-J<sub>2</sub>) Representative confocal image of a *mb1<sup>NP0420</sup>>GFP.nls* (green) adult brain co-labeled with an ELAV antibody (red). Dashed lines demarcate GFP(+) cells. (K) Quantification of *mb1<sup>NP0420</sup>>GFP.nls* in third instar and adult brains where ~80-90% of GFP(+) cells are also ELAV(+). (L-M) In third instar and adult brains, *mb1<sup>NP0420</sup>>GFP.nls* overlaps minimally with Repo (red). (L<sub>1</sub>-L<sub>2</sub>) Representative confocal image of a *mb1<sup>NP0420</sup>>GFP.nls* adult brain labeled with Repo. Dashed lines demarcate GFP(+) cells. White solid arrowheads show GFP(+) cells that are positive for Repo. (M) Quantification of *mb1<sup>NP0420</sup>>GFP.nls* in third instar and adult brains where ~10-15% of GFP (+) cells are also Repo(+). (N<sub>1</sub>-N<sub>2</sub>) *mb1<sup>NP0420</sup>>GFP.nls* expression is not detected in third instar muscles m4-m8, m12 and m13 (Phalloidin, red).

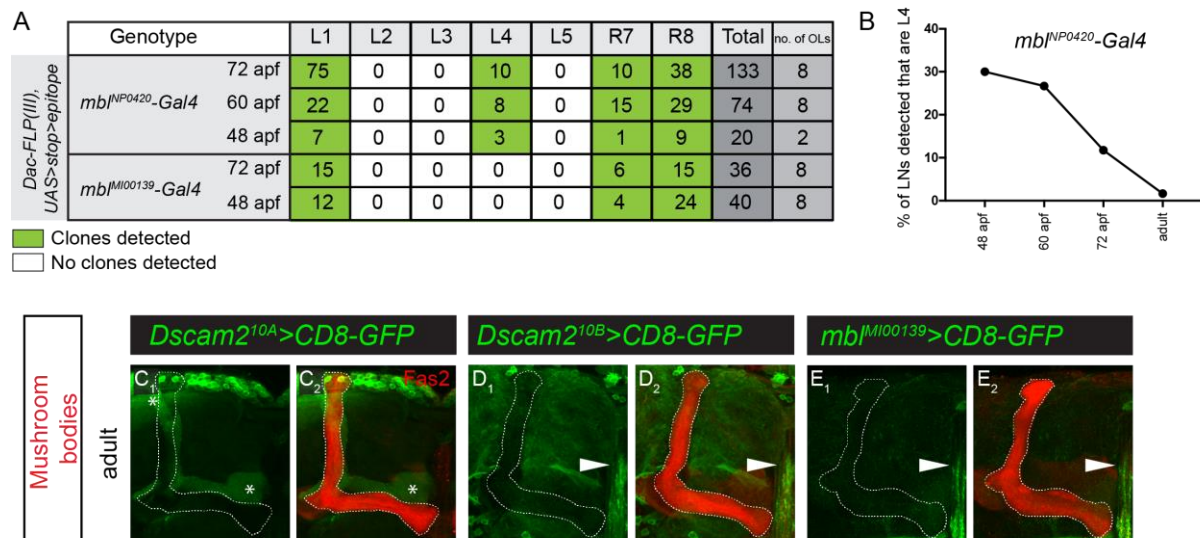

**Fig. S4. *Mbl* expression is cell type specific and correlates with *Dscam2.10B*.** (A)

Quantification of lamina neurons and R7-R8 neurons observed using the intersectional strategy during development. Two different *mb<sup>l</sup>* reporters were used. The transcriptional reporter labeled L4 cells early in development whereas the splicing trap reporter did not. This is most likely due to the lower efficiency of the splicing trap given that it produced 5X fewer L1 clones at 72hr compared to the transcriptional reporter. Green boxes represent detection of reporter expression at different hours after pupal formation (apf). (B) A plot of the percentage of L4 lamina neurons over total lamina neurons during development (data from the *mb<sup>l</sup>* transcriptional reporter).

(C-E) *Mbl* is not detected in MB neurons that express *Dscam2.10A* in adults. (C<sub>1</sub>-C<sub>2</sub>) *Dscam2.10A* is expressed in  $\alpha'\beta'$  mushroom body neurons (asterisks) but not the  $\alpha\beta$  and  $\gamma$  subsets of MB neurons labeled by Fas2 (red). Neither *Dscam2.10B* (D<sub>1</sub>-D<sub>2</sub>) nor *mb<sup>l</sup>* (E<sub>1</sub>-E<sub>2</sub>) are expressed in developing MB neurons. Neurons in the midline express both *Dscam2.10B* and *mb<sup>l</sup>* (white arrowhead).

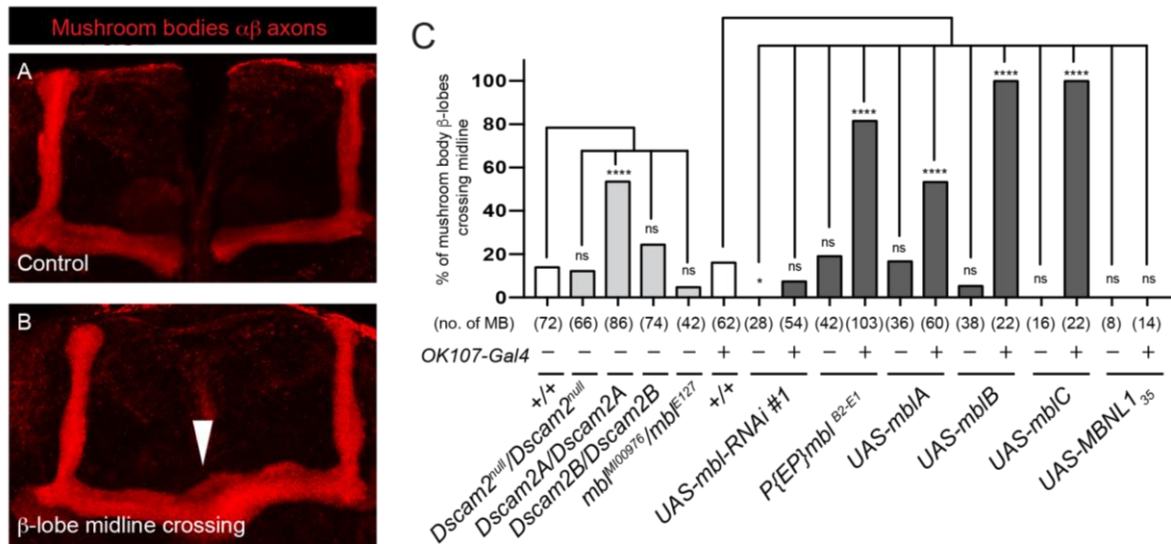

**Fig. S5. Neurons overexpressing mbl phenocopy *Dscam2* single-isoform mutants.** (A-B) MBs overexpressing *mbl* exhibit defects associated with *Dscam2* single isoform mutants. (A) A representative confocal image of control adult  $\alpha\beta$  lobes (red) with clear separation between the two  $\beta$ -lobes at the midline. (B) A representative confocal image of adult  $\alpha\beta$  lobes from an animal overexpressing *mblA*.  $\beta$ -lobe axons inappropriately cross the midline (arrowhead). (C) Quantification of  $\beta$ -lobe axon midline crossing defects. Numbers in parentheses represent total number of MBs quantified. Fishers exact test was used to compare genotypes to their corresponding controls (white bars). ns (not significant)  $P>0.05$ , \*  $P<0.05$  and \*\*\*\*  $P<0.0001$ .

**Table S1. List of tested RNAi lines that did not derepress *Dscam2.10A* in R cells.**

| Flybase Number | CG Number | Gene Name    | RNAi ID | no. of oiled | no. of animals | Flybase Number | CG Number | Gene Name      | RNAi ID     | no. of oiled | no. of animals | Flybase Number | CG Number | Gene Name    | RNAi ID      | no. of oiled | no. of animals |
|----------------|-----------|--------------|---------|--------------|----------------|----------------|-----------|----------------|-------------|--------------|----------------|----------------|-----------|--------------|--------------|--------------|----------------|
| FBgn0052062    | CG32062   | A2bp1        | 27296   | 12           | 6              | FBgn0024698    | CG10110   | Cpsf160        | v18009      | 11           | 6              | FBgn0260944    | CG17136   | Rbp1         | v110008      | 11           | 6              |
| FBgn026239     | CG6671    | AGO1         | 33727   | 3            | 2              | FBgn0024698    | CG10110   | Cpsf160        | v110571     | 9            | 6              | FBgn0030479    | CG1987    | Rbp1-like    | v105883      | 10           | 6              |
| FBgn0000114    | CG31762   | aret         | 44483   | 18           | 9              | FBgn0261065    | CG7698    | Cpsf73         | v39558      | 9            | 5              | FBgn0030479    | CG1987    | Rbp1-like    | 44100        | 4            | 2              |
| FBgn0004587    | CG10851   | B52          | v38862  | 16           | 8              | FBgn0000377    | CG3193    | crn            | v25919      | 10           | 5              | FBgn0260943    | CG32169   | rbp6         | 61324/CyOb   | 8            | 4              |
| FBgn0004587    | CG10851   | B52          | v38860  | 4            | 2              | FBgn0039867    | CG2261    | CatF-50        | v43716      | 10           | 5              | FBgn0015778    | CG9412    | rin          | 33392/TMB6   | 12           | 7              |
| FBgn0037660    | CG18005   | beag         | v103832 | 8            | 4              | FBgn0039867    | CG2261    | CatF-50        | v109583     | 8            | 4              | FBgn0003261    | CG10279   | Rrm62        | v46908/TMB6  | 12           | 6              |
| FBgn0015907    | CG13425   | bl           | v2912   | 10           | 6              | FBgn0027841    | CG7697    | CatF-64        | v21045/CyOb | 10           | 6              | FBgn0037707    | CG16788   | RpsS1        | 56910        | 10           | 5              |
| FBgn0015907    | CG13425   | bl           | v105271 | 9            | 5              | FBgn0010220    | CG12759   | Dbp45A         | v17306      | 6            | 3              | FBgn0037707    | CG16788   | RpsS1        | 36590        | 6            | 3              |
| FBgn0262475    | CG6319    | bru-2        | 50631   | 13           | 7              | FBgn0010221    | CG12760   | Dbp45A         | v104183     | 13           | 7              | FBgn0005649    | CG5422    | Rox8         | v100563      | 10           | 5              |
| FBgn0264001    | CG43744   | bru-3        | 50734   | 8            | 4              | FBgn0033190    | CG11107   | Dhx15          | v44119/CyOb | 10           | 6              | FBgn0005649    | CG5422    | Rox8         | v41439       | 12           | 6              |
| FBgn0031883    | CG11266   | Caper        | 55742   | 10           | 6              | FBgn0031601    | CG3058    | Dim1           | v21258      | 10           | 5              | FBgn0011305    | CG5655    | Ranf         | v22186/TM3   | 15           | 10             |
| FBgn0031883    | CG11266   | Caper        | 55742   | 8            | 4              | FBgn0259220    | CG42320   | Doa            | v19066      | 9            | 5              | FBgn0267790    | CG9373    | rumf         | 42685/CyOb   | 6            | 3              |
| FBgn022942     | CG7035    | Cyph8        | v22331  | 12           | 8              | FBgn0203056    | CG6996    | dom            | v17787      | 2            | 1              | FBgn0039229    | CG6995    | Saf-B        | 51759        | 5            | 5              |
| FBgn0261336    | CG6905    | Cdc5         | v13492  | 2            | 1              | FBgn0000562    | CG4051    | egl            | 28969       | 8            | 4              | FBgn0265298    | CG5442    | SC35         | v40590       | 5            | 3              |
| FBgn0261336    | CG6905    | Cdc5         | v109369 | 10           | 5              | FBgn0019142    | CG6975    | eIF-4a         | v42202      | lethal       |                | FBgn0265298    | CG5442    | SC35         | v104979      | 6            | 3              |
| FBgn0032690    | CG10333   | CG10333      | v18132  | 12           | 8              | FBgn0034237    | CG4878    | eIF3-59        | 32980       | lethal       |                | FBgn0265298    | CG5442    | SC35         | v13426       | 3            | 2              |
| FBgn0032690    | CG10333   | CG10333      | v18133  | 4            | 2              | FBgn0260400    | CG4262    | elav           | 28371       | 2            | 1              | FBgn0040294    | CG6987    | SF2          | v27775/TM3   | 13           | 7              |
| FBgn0036277    | CG10418   | CG10418      | v105940 | 11           | 6              | FBgn0033859    | CG6197    | famd           | v104186     | 10           | 5              | FBgn0040294    | CG6987    | SF2          | v27776/TMB6  | 6            | 4              |
| FBgn0037531    | CG10445   | CG10445      | v104753 | 14           | 7              | FBgn0036850    | CG10419   | Gem2           | v47372      | 13           | 8              | FBgn0052423    | CG32423   | shp2         | 43545        | 4            | 3              |
| FBgn0036314    | CG10754   | CG10754      | v13346  | 11           | 8              | FBgn0036850    | CG10419   | Gem2           | v47374      | 10           | 7              | FBgn0002354    | CG1420    | Shb          | v103587      | 5            | 3              |
| FBgn0039920    | CG11360   | v8491        | v8491   | 15           | 8              | FBgn0259139    | CG6946    | glo            | 33668       | 9            | 6              | FBgn0026260    | CG5352    | Smd1         | v40587       | 3            | 2              |
| FBgn0039920    | CG11360   | v8492        | v8492   | 11           | 6              | FBgn0259139    | CG6946    | glo            | v27752      | 12           | 6              | FBgn0026260    | CG5352    | Smd1         | v110713      | 12           | 6              |
| FBgn0035692    | CG13298   | v5257        | v5257   | 8            | 4              | FBgn0001179    | CG8019    | hay            | v41023      | 12           | 8              | FBgn0261933    | CG10753   | Smd1         | v31343/TMB6  | 8            | 4              |
| FBgn0035162    | CG13900   | v18965       | v18965  | 9            | 6              | FBgn0014189    | CG7269    | Hea25E         | v22567      | 9            | 5              | FBgn0261933    | CG10753   | Smd1         | v31342       | 7            | 4              |
| FBgn0035162    | CG13900   | v108248      | v108248 | 16           | 8              | FBgn0011224    | CG31000   | heph           | v33735      | 10           | 6              | FBgn0261789    | CG1249    | Smd2         | v31947       | 4            | 2              |
| FBgn0037220    | CG14641   | v110507/CyOb | v110507 | 11           | 6              | FBgn0011224    | CG31000   | heph           | v110749     | 18           | 10             | FBgn0261789    | CG1249    | Smd2         | v31946       | 8            | 4              |
| FBgn0038464    | CG16941   | v20338       | v20338  | 1            | 1              | FBgn0264491    | CG10293   | how            | v13756      | 10           | 5              | FBgn0261789    | CG1249    | Smd2         | v100690      | 4            | 2              |
| FBgn0033089    | CG17266   | v25243       | v25243  | 10           | 5              | FBgn0264491    | CG10293   | how            | v100775     | 10           | 5              | FBgn0223167    | CG8427    | Smd3         | v35933       | 8            | 5              |
| FBgn0033089    | CG17266   | v25244       | v25244  | 2            | 1              | FBgn0004838    | CG10377   | Hrb27c, Hrp48  | v16040      | 12           | 7              | FBgn0261790    | CG18591   | SmE          | v23569       | 4            | 2              |
| FBgn0029751    | CG17764   | v20541       | v20541  | 12           | 7              | FBgn0004838    | CG10377   | Hrb27c, Hrp48  | 31685       | 6            | 3              | FBgn0261790    | CG18591   | SmE          | v23570/TMB6  | 10           | 5              |
| FBgn0029751    | CG17764   | v101894      | v101894 | 10           | 5              | FBgn0004838    | CG10377   | Hrb27c, Hrp48  | 33716       | 8            | 4              | FBgn0000426    | CG16792   | Smf          | v107644/CyOb | lethal       |                |
| FBgn0035271    | CG2021    | 28579        | 28579   | 8            | 5              | FBgn0004237    | CG12749   | Hrb87F, hsp36  | 51297       | 9            | 6              | FBgn0000426    | CG16792   | Smf          | 26734        | 12           | 6              |
| FBgn0035271    | CG2021    | v21602       | v21602  | 8            | 5              | FBgn0004237    | CG12749   | Hrb87F, hsp36  | 62937       | 11           | 6              | FBgn0036641    | CG16725   | Snn          | v100392      | 7            | 4              |
| FBgn0037344    | CG2926    | v33589       | v33589  | 11           | 5              | FBgn0004237    | CG12749   | Hrb87F, hsp36  | 31244       | 14           | 8              | FBgn0003449    | CG4528    | snf          | 51459        | 16           | 8              |
| FBgn050122     | CG30122   | v5209        | v5209   | 6            | 3              | FBgn001215     | CG9883    | Hrb98DE, hsp36 | 31303       | 10           | 7              | FBgn0003449    | CG4528    | snf          | 55914        | 9            | 5              |
| FBgn0031631    | CG3225    | v24725       | v24725  | 9            | 5              | FBgn001215     | CG9883    | Hrb98DE, hsp36 | 32351       | 13           | 8              | FBgn0016978    | CG8749    | snRNP-U1-70K | v23150       | 11           | 8              |
| FBgn0052533    | CG32533   | v98634       | v98634  | 1            | 1              | FBgn0015949    | CG8954    | hrp            | v42283      | 12           | 6              | FBgn0016978    | CG8749    | snRNP-U1-70K | v23151       | 10           | 6              |
| FBgn0052533    | CG32533   | v51785       | v51785  | 11           | 6              | FBgn0002431    | CG9484    | hyd            | v44675      | 12           | 6              | FBgn0261792    | CG5454    | snRNP-U1-C   | v22132       | 11           | 6              |
| FBgn0031628    | CG3294    | v21111/TMB6  | v21111  | 12           | 6              | FBgn0039691    | CG1972    | hns11          | v33450      | 7            | 5              | FBgn0261792    | CG5454    | snRNP-U1-C   | v22133       | 10           | 5              |
| FBgn0031628    | CG3294    | v21111/TMB6  | v21111  | 12           | 6              | FBgn0039691    | CG1972    | hns11          | v109408     | 8            | 5              | FBgn0261791    | CG2742    | SNRPG        | v32526       | 10           | 5              |
| FBgn0053108    | CG33108   | v40996       | v40996  | 9            | 5              | FBgn0036570    | CG5222    | ins9           | v110367     | 10           | 5              | FBgn0015819    | CG3780    | Spx          | v40471       | 9            | 5              |
| FBgn0031229    | CG3436    | v5207/CyOb   | v5207   | 4            | 2              | FBgn0026713    | CG32604   | l(1)09007      | v31908      | 15           | 8              | FBgn0015819    | CG3780    | Spx          | v40472       | 9            | 5              |
| FBgn0031492    | CG3542    | v26227       | v26227  | 10           | 5              | FBgn0026714    | CG32605   | l(1)09008      | v31909      | 4            | 2              | FBgn0263396    | CG16901   | srd, hrp40   | v32966       | 12           | 6              |
| FBgn0031492    | CG3542    | v26229       | v26229  | 4            | 2              | FBgn0086444    | CG18699   | l(2)37Cb       | v31324      | 9            | 6              | FBgn0263396    | CG16901   | srd, hrp40   | 31302        | 20           | 10             |
| FBgn0031493    | CG3605    | v26250       | v26250  | 12           | 7              | FBgn0263599    | CG5931    | l(3)72Ab       | v43962      | 5            | 3              | FBgn0036340    | CG11274   | SREM160      | v4639        | 9            | 5              |
| FBgn0031493    | CG3605    | v26252       | v26252  | 8            | 5              | FBgn0263600    | CG5932    | l(3)72Ab       | v110666     | 6            | 3              | FBgn0036340    | CG11274   | SREM160      | v100751      | 8            | 4              |
| FBgn0035987    | CG3689    | v45278       | v45278  | 10           | 5              | FBgn0035638    | CG7942    | ltdr           | v110582     | 8            | 5              | FBgn0015298    | CG4467    | Srp19        | 51160        | lethal       |                |
| FBgn028474     | CG4119    | v26395       | v26395  | 9            | 5              | FBgn0035638    | CG7942    | ltdr           | 55661       | 8            | 6              | FBgn0024285    | CG4602    | Srp54        | v51088       | 8            | 6              |
| FBgn0028474    | CG4119    | v106696/CyOb | v106696 | 10           | 6              | FBgn0034834    | CG3162    | LS2            | v21379      | 11           | 7              | FBgn0024285    | CG4602    | Srp54        | 55254        | 9            | 5              |
| FBgn0034598    | CG4266    | v26472       | v26472  | 14           | 7              | FBgn0034834    | CG3162    | LS2            | v21380      | 14           | 7              | FBgn0026370    | CG8174    | SRPK         | v103416      | 9            | 6              |
| FBgn0034598    | CG4266    | v26475       | v26475  | 4            | 2              | FBgn0261067    | CG4279    | Lsm1           | v28793      | 11           | 6              | FBgn0025702    | CG11489   | spk79D       | v47544       | 8            | 5              |
| FBgn0031287    | CG4291    | v21819/TMB6  | v21819  | 11           | 6              | FBgn0261067    | CG4279    | Lsm1           | v50653      | 10           | 5              | FBgn0025702    | CG11489   | spk79D       | v47545       | 10           | 5              |
| FBgn0035016    | CG4612    | v52497       | v52497  | 9            | 5              | FBgn0033450    | CG12924   | Lsm11          | v1108336    | 12           | 6              | FBgn0003520    | CG5753    | stau         | 31247        | 9            | 5              |
| FBgn0039566    | CG4849    | v21902       | v21902  | 9            | 5              | FBgn0051184    | CG31184   | Lsm3           | 56882       | 4            | 2              | FBgn0003559    | CG17170   | su(f)        | v110125      | 6            | 3              |
| FBgn0032194    | CG4901    | v34004       | v34004  | 11           | 6              | FBgn0261068    | CG13277   | Lsm7           | v23862      | 10           | 6              | FBgn0003638    | CG3019    | su(wa)       | v25597       | 12           | 9              |
| FBgn0038344    | CG5205    | v107262      | v107262 | 9            | 5              | FBgn0011666    | CG5099    | msi            | 55152       | 10           | 5              | FBgn0003638    | CG3019    | su(wa)       | v104716      | 10           | 5              |
| FBgn0039182    | CG5728    | v24697       | v24697  | 14           | 7              | FBgn0262737    | CG7437    | mub            | v28024      | 16           | 9              | FBgn0264270    | CG43770   | Svl          | 34393        | 10           | 5              |
| FBgn0038927    | CG6015    | v46565       | v46565  | lethal       |                | FBgn0014366    | CG9295    | noi            | v20943      | 9            | 5              | FBgn0037371    | CG2097    | Sym          | v33470       | 9            | 5              |
| FBgn0030631    | CG6227    | v40351       | v40351  | 11           | 6              | FBgn0015520    | CG10328   | nonA-1         | v101567     | 7            | 4              | FBgn0038826    | CG17838   | symp         | 56972        | 10           | 5              |
| FBgn0030632    | CG6227    | v40352       | v40352  | 12           | 8              | FBgn0015520    | CG10328   | nonA-1         | 52934       | 3            | 2              | FBgn0038826    | CG17838   | symp         | v33012       | 15           | 9              |
| FBgn0040043    | CG6354    | v31333       | v31333  | 12           | 9              | FBgn0261619    | CG5119    | pAbp           | v22007      | 9            | 5              | FBgn0025790    | CG10327   | TBPH         | v38377       | 7            | 4              |
| FBgn0040043    | CG6354    | v5662        | v5662   | 8            | 4              | FBgn0005648    | CG2163    | Pabp2          | v106466     | 10           | 5              | FBgn0025790    | CG10327   | TBPH         | v38379       | 10           | 5              |
| FBgn0035675    | CG6610    | v106830      | v106830 | 10           | 6              | FBgn0086895    | CG8241    | pea            | v47782      | 9            | 5              | FBgn0003741    | CG16724   | tra          | v2560        | 12           | 6              |
| FBgn0035675    | CG6610    | v18170       | v18170  | 10           | 6              | FBgn0027784    | CG6011    | Pip18          | v13760      | 10           | 6              | FBgn0003742    | CG10128   | tra2         | v8968        | 9            | 5              |
| FBgn0036828    | CG6841    | v34253/CyOb  | v34253  | 10           | 5              | FBgn0027784    | CG6011    | Pip18          | v100287     | 2            | 1              | FBgn0039117    | CG10210   | lst          | v38356       | 8            | 4              |
| FBgn0030085    | CG6999    | v110143      | v110143 | 11           | 7              | FBgn0261119    | CG5519    | Pip19          | v108575     | 11           | 6              | FBgn0039117    | CG10210   | lst          | v108216      | 12           | 6              |
| FBgn0030085    | CG6999    | v5157        | v5157   | 12           | 6              | FBgn0261119    | CG5519    | Pip19          | v41438      | 3            | 2              | FBgn0033378    | CG8781    | tsu          | 55367        | 10           | 6              |
| FBgn0035872    | CG7185    | v107147      | v107147 | 5            | 3              | FBgn0039615    | CG7757    | Pip3           | v25448      | 9            | 6              | FBgn0033378    | CG8781    | tsu          | 28955        | 9            | 5              |
| FBgn0035872    | CG7185    | v34804       | v34804  | 14           | 7              | FBgn0036487    | CG6876    | Pip31          | v51131      | 3            | 2              | FBgn0033210    | CG1406    | U2A          | v17358/TMB6  | 9            | 5              |
| FBgn0036734    | CG7564    | v100562      | v100562 | 10           | 5              | FBgn0036487    | CG6876    | Pip31          | v103721     | 6            | 3              | FBgn0033210    | CG1406    | U2A          | v109815      | 11           |                |
